# Supplementary material for: Crack luminescence as an innovative method for detection of fatigue damage
Source: Copernicus journal article supplement (doi:10.5194/jsss-7-259-2018), 2018-04-10
Supplement: Supplementary file 1 [file jsss-7-259-2018-supplement.zip]

Supplement of J. Sens. Sens. Syst., 7, 259–266, 2018  
<https://doi.org/10.5194/jsss-7-259-2018-supplement>  
© Author(s) 2018. This work is distributed under  
the Creative Commons Attribution 4.0 License.

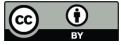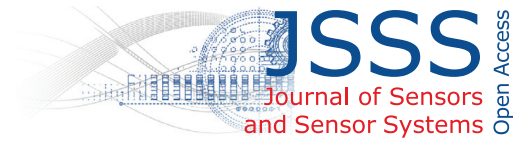

*Supplement of*

## **Crack luminescence as an innovative method for detection of fatigue damage**

**Ruben Makris et al.**

*Correspondence to:* Ruben Makris ([ruben.makris@bam.de](mailto:ruben.makris@bam.de))

- [jsss-7-259-2018-supplement-title-page.pdf](#)
- [S6P27x1600.avi](#)

The copyright of individual parts of the supplement might differ from the CC BY 4.0 License.
