# Supplementary material for: Crack luminescence as an innovative method for detection of fatigue damage
Source: Copernicus journal article supplement (doi:10.5194/jsss-7-259-2018), 2018-04-10
Supplement: Supplementary file 2 [file jsss-7-259-2018-supplement.zip]

Archive with 2 entries (2 files):
- jsss-7-259-2018-supplement-title-page.pdf
- S6P27x1600.avi
